# Supplementary material for: A High Crystalline Perylene-Based Hydrogen-Bonded Organic Framework for Enhanced Photocatalytic H2O2 Evolution
Source: MDPI journal article supplement (doi:10.3390/molecules28196850), 2023-09-28
Supplement: s1 [file s1]

## ***Electronic Supplementary Information (ESI)***

# **A High Crystalline Perylene-based Hydrogen-bonded Organic Framework for Enhanced Photocatalytic H<sub>2</sub>O<sub>2</sub> Evolution**

**Mengke Hu <sup>†</sup>, Chenxi Wu <sup>†</sup>, Shufan Feng and Jianli Hua <sup>\*</sup>**

Key Laboratory for Advanced Materials, School of Chemistry and Molecular Engineering, East China University of Science and Technology, 130 Meilong Road, Shanghai 200237, China; y30210401@mail.ecust.edu.cn (M.H.); y30230414@mail.ecust.edu.cn (C.W.); y12223040@mail.ecust.edu.cn (S.F.)

<sup>\*</sup> Correspondence: jlhua@ecust.edu.cn

<sup>†</sup> These authors contributed equally to this work.

## Table of Contents

| Section      | Title                                                | Pages |
|--------------|------------------------------------------------------|-------|
| Figure S1    | XPS spectra of <b>PTPA</b>                           | S3    |
| Figure S2    | Tauc plots of <b>PTBA</b> and <b>PTPA</b>            | S3    |
| Figure S3    | Mott-Schottky plots of <b>PTBA</b> and <b>PTPA</b>   | S3    |
| Figure S4    | XPS spectra of <b>PTBA</b> before and after reaction | S4    |
| Figure S5-10 | NMR and MS (MALDI TOF) spectra                       | S5-7  |

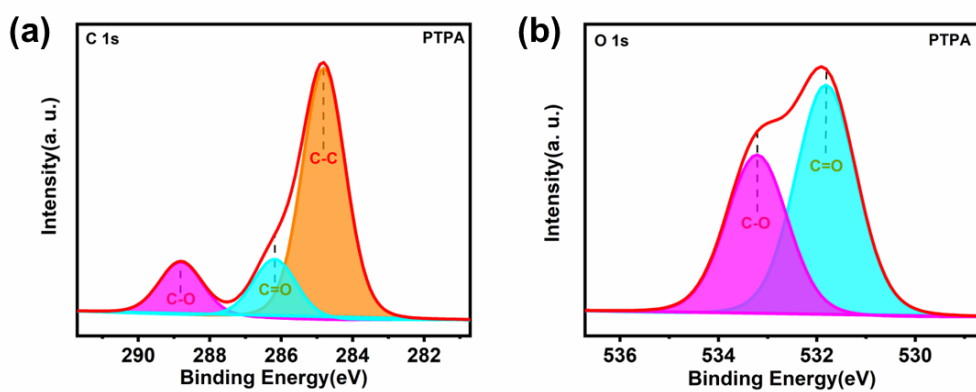

Figure S1. XPS spectra of **PTPA** (a) C 1s and (b) O 1s.

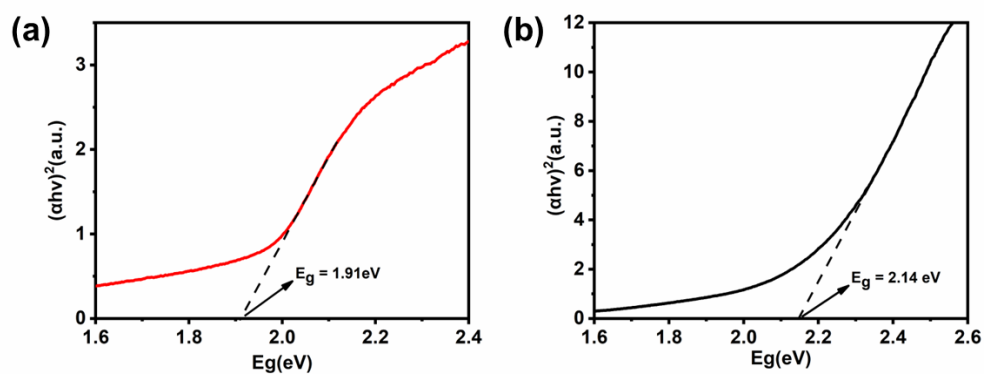

Figure S2. Tauc plots of (a) **PTBA** and (b) **PTPA**.

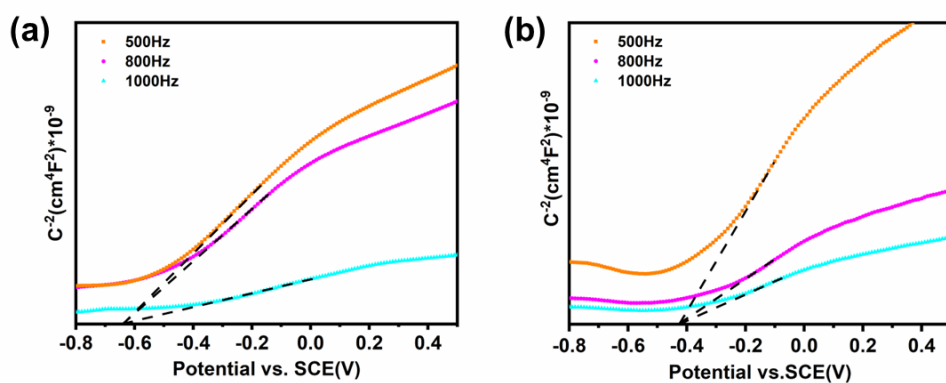

Figure S3. Mott-Schottky plots of (a) **PTBA** and (b) **PTPA**.

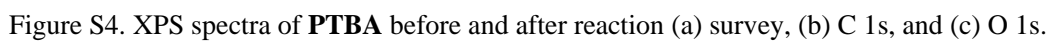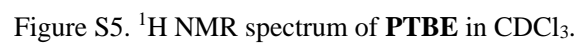

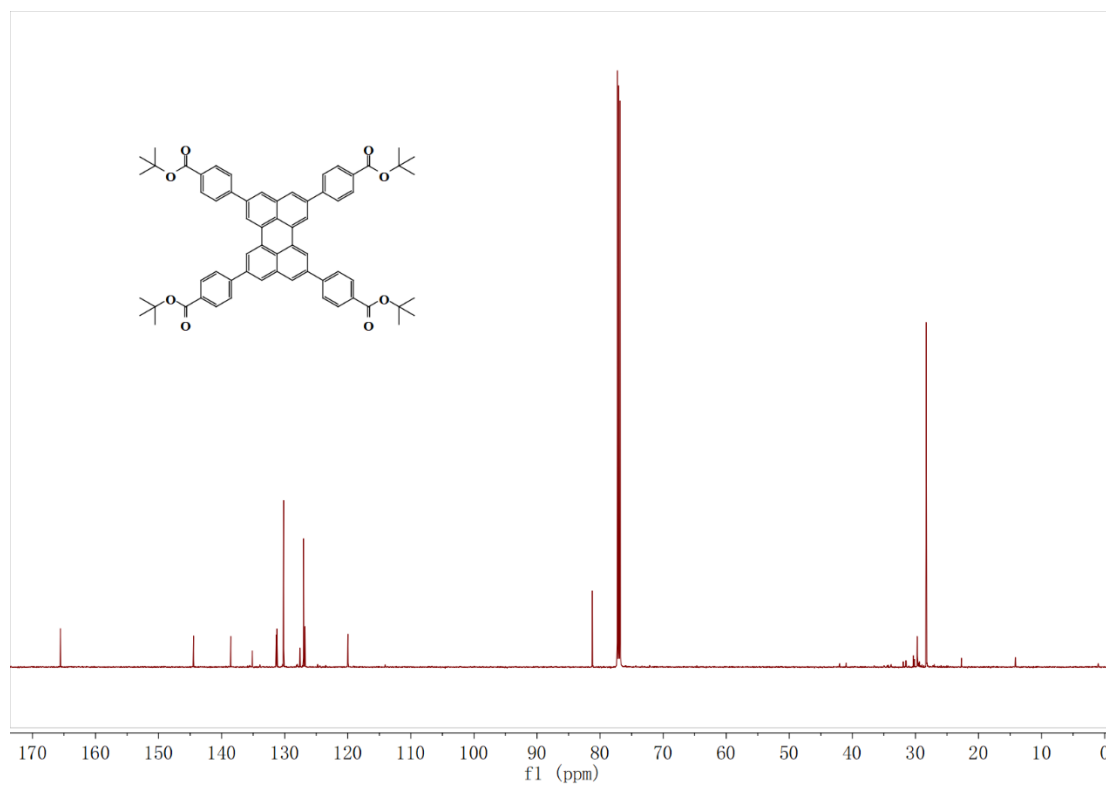

Figure S6.  $^{13}\text{C}$  NMR spectrum of **PTBE** in  $\text{CDCl}_3$ .

Applied Biosystems 4700 Proteomics Analyzer T2020

4700 Reflector Spec #1 MC[BP = 956.3, 3151]

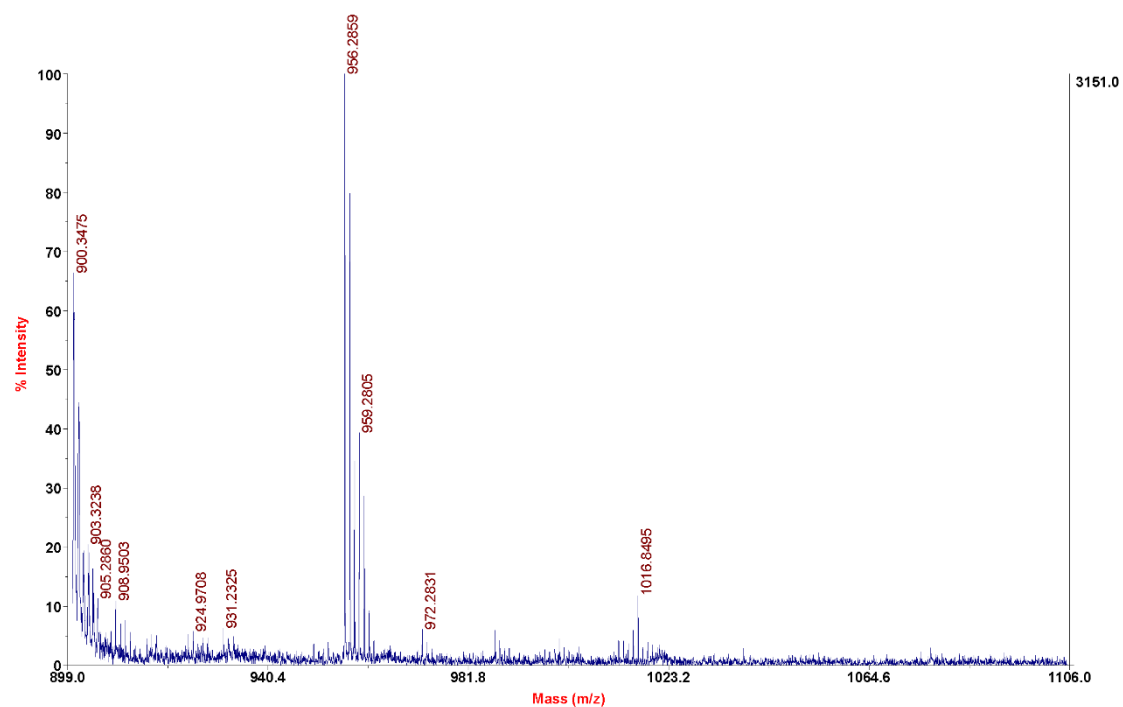

Figure S7. MS (MALDI TOF) of **PTBE**.

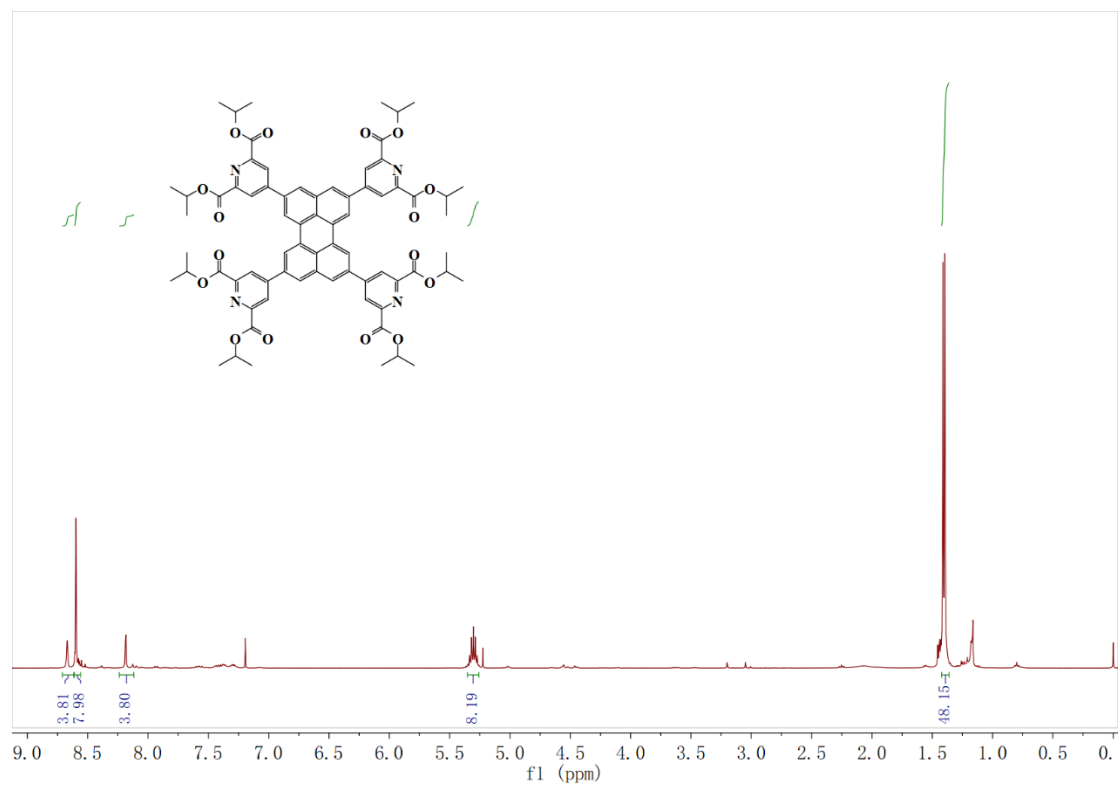

Figure S8.  $^1\text{H}$  NMR spectrum of **PTPE** in  $\text{CDCl}_3$ .

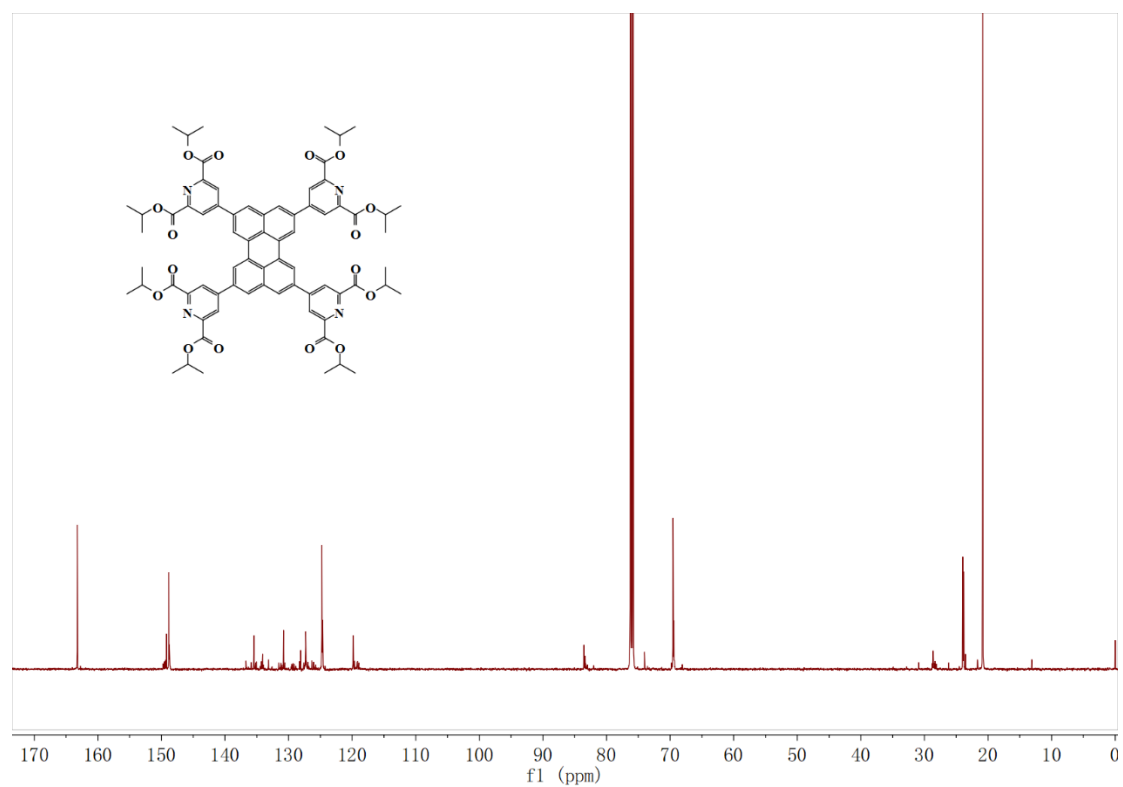

Figure S9.  $^{13}\text{C}$  NMR spectrum of **PTPE** in  $\text{CDCl}_3$ .

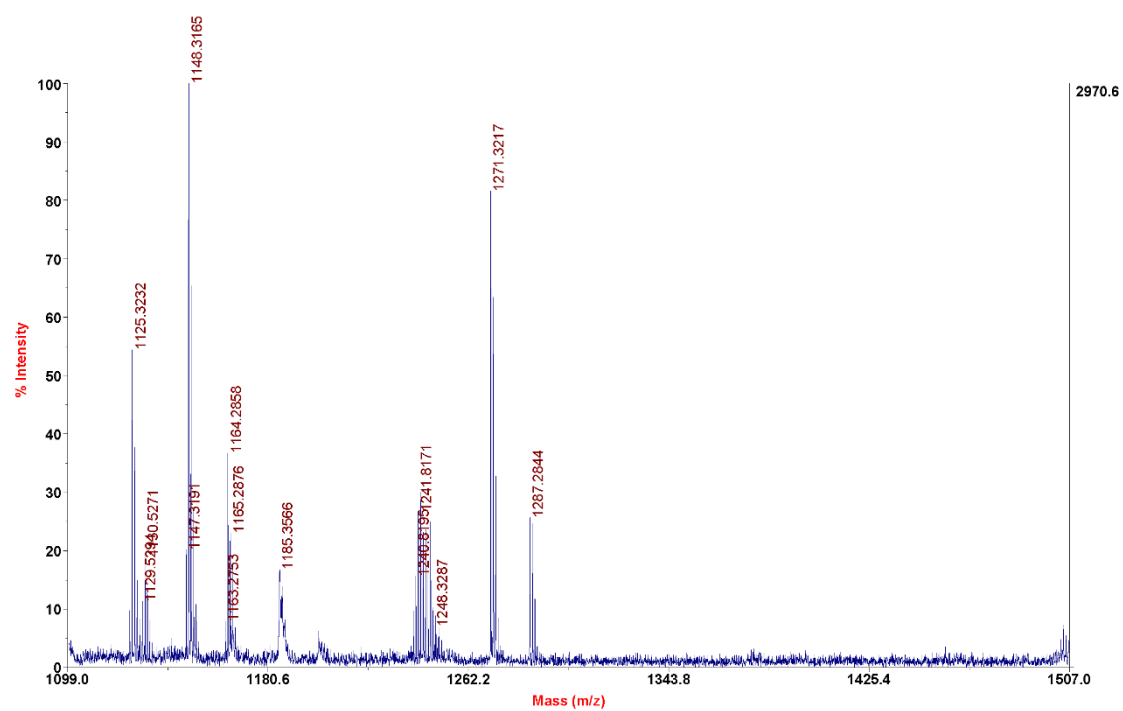

\\AK2020\Export\T2D\wt\20230728\N23\_MS\_212d

Printed: 15:54, July 28, 2023

Figure S10. MS (MALDI TOF) of **PTPE**.
